# Supplementary material
Source: publisher site journal article supplement (https://www.dovepress.com/article/323391)
Supplement: Supplementary file 1 [file get_supplementary_file.php]

**Appendix Table 1.** Anatomical Therapeutic Chemical (ATC) classification system codes used to identify initiators of statins and fibratesa

| Medications | ATC classification System Codes |
| --- | --- |
| Statins |  |
| Simvastatin | C10AA01, C10BA02b |
| Lovastatin | C10AA02, C10BA01c |
| Pravastatin | C10AA03 |
| Fluvastatin | C10AA04 |
| Atorvastatin | C10AA05, C10BA05b, C10BX03b |
| Rosuvastatin | C10AA07 |
| Pitavastatin | C10AA08 |
| Fibrates |  |
| Clofibrate | C10AB01 |
| Bezafibrate | C10AB02 |
| Aluminium Clofibrate | C10AB03 |
| Gemfibrozil | C10AB04 |
| Fenofibrate | C10AB05 |
| Simfibrate | C10AB06 |
| Etofibrate | C10AB09 |

aOnly included medications reimbursed in Taiwan.

bIn combination with ezetimibe.

cIn combination with nicotinic acid.

**Appendix Table 2.** International Classification of Diseases, 9th Revision, Clinical Modification (ICD-9-CM) diagnosis codes or procedure codes or Taiwan health insurance service claims codesa used to measure baseline resource utilization

| Utilization | ICD-9-CM diagnosis or procedure codes or  Taiwan health insurance service claims codes |
| --- | --- |
| No of any outpatient visits |  |
| No of outpatient visits due to cardiovascular diseases | Cardiovacular disease included:   - Hypertension   ICD-9-CM diagnosis codes: 401-405   - Ischemic heart disease   ICD-9-CM diagnosis codes: 411, 413, 414   - Myocardial infarction   ICD-9-CM diagnosis codes: 410, 412   - Coronary revascularization   Coronary artery bypass grafting  ICD-9-CM procedure codes: 36.1, 36.2  Taiwan health insurance service claims codes: 68023A, 68023B, 68024A, 68024B, 68025A, 68025B, 83064A1, 97901K, 97902A, 97903B, 97906K, 97907A, 97908B, 97911K, 97912A, 97913B,97916K, 97917A, 97918B  Percutaneous transluminal coronary angioplasty  ICD-9-CM procedure codes: 00.66, 36.01, 36.02, 36.05, 36.06, 36.07, 36.09  Taiwan health insurance service claims codes: 33076A, 33076B, 33077A, 33077B, 33078A, 33078B, 97511K, 97512A, 97513B, 97516K, 97517A, 97518B, 97521K, 97522A, 97523B   - Cardiac dysrhythmia   ICD-9-CM diagnosis codes: 427   - Congestive heart failure   ICD-9-CM diagnosis codes: 428, 398.91, 402.01, 402.11, 402.91, 404.01, 404.11, 404.91, 404.03, 404.13, 404.93   - Cereborvascular disease   ICD-9-CM diagnosis codes: 430-438   - Peripheral vascular disease   ICD-9-CM diagnosis codes: 440.2, 440.4, 443.81, 443.9 |
| No of outpatient visits due to respiratory diseases | Respiratory disease included   - Asthma   ICD-9-CM diagnosis codes: 493   - Pneumonia   ICD-9-CM diagnosis codes: 480-486   - Influenza   ICD-9-CM diagnosis codes: 487   - Acute bronchochitis   ICD-9-CM diagnosis codes: 466 |
| No of outpatient visits due to COPD | ICD-9-CM diagnosis codes: 491, 492, 496 |
| Number of hospitalizations |  |
| Number of hospitalizations due to cardiovascular disease | See above |
| Number of hospitalizations due to respiratory disease | See above |
| Number of hospitalizations due to COPD | See above |
| Testing of the cholesterol level | Taiwan health insurance service claims codes: 09001C |
| Testing of the triglycerides level | Taiwan health insurance service claims codes: 09004C |
| Pneumonia and influenza vaccination | - Pneumonia vaccination   Taiwan health insurance service claims codes: K000492206   - Influenza vaccination   ICD-9 CM diagnosis codes: V04.7, V04.8  Case typeb: 92 (Influenza) |

COPD, chronic obstructive pulmonary disease.

a<https://www.nhi.gov.tw/query/query2.aspx> Accessed April 16, 2021.

bIndicator for being enrolled in the elderly influenza vaccination program.

**Appendix Table 3.** International Classification of Diseases, 9th Revision, Clinical Modification (ICD-9-CM) diagnosis codes or procedure codes or Taiwan health insurance service claims codesa used to ascertain baseline comorbidities

| Comorbidities | ICD-9-CM diagnosis or procedure codes or  Taiwan health insurance service claims codes |
| --- | --- |
| Hypertension | ICD-9-CM diagnosis codes: 401-405 |
| Ischemic heart disease | ICD-9-CM diagnosis codes: 411, 413, 414 |
| Myocardial infarction | ICD-9-CM diagnosis codes: 410, 412 |
| Coronary revascularization | Coronary artery bypass grafting  ICD-9-CM procedure codes: 36.1, 36.2  Taiwan health insurance service claims codes: 68023A, 68023B, 68024A, 68024B, 68025A, 68025B, 83064A1, 97901K, 97902A, 97903B, 97906K, 97907A, 97908B, 97911K, 97912A, 97913B,97916K, 97917A, 97918B |
|  | Percutaneous transluminal coronary angioplasty  ICD-9-CM procedure codes: 00.66, 36.01, 36.02, 36.05, 36.06, 36.07, 36.09  Taiwan health insurance service claims codes: 33076A, 33076B, 33077A, 33077B, 33078A, 33078B, 97511K, 97512A, 97513B, 97516K, 97517A, 97518B, 97521K, 97522A, 97523B |
| Cardiac dysrhythmia | ICD-9-CM diagnosis codes: 427 |
| Congestive heart failure | ICD-9-CM diagnosis codes: 428, 398.91, 402.01, 402.11, 402.91, 404.01, 404.11, 404.91, 404.03, 404.13, 404.93 |
| Cereborvascular disease | ICD-9-CM diagnosis codes: 430-438 |
| Peripheral vascular disease | ICD-9-CM diagnosis codes: 440.2, 440.4, 443.81, 443.9 |
| Hyperlipidemia | ICD-9-CM diagnosis codes: 272 |
| Diabetes mellitus | ICD-9-CM diagnosis codes: 250 |
| Thyroid disease | ICD-9-CM diagnosis codes: 244.9 |
| Asthma | ICD-9-CM diagnosis codes: 493 |
| Pneumonia, influenza, or acute bronchitis | ICD-9-CM diagnosis codes: 480-487, 466 |
| Acute bronchiectasis | ICD-9-CM diagnosis codes: 494 |
| Tuberculosis | ICD-9-CM diagnosis codes: 010-018 |
| Chronic liver disease | ICD-9-CM diagnosis codes: 070.2, 070.3, 070.41, 070.44, 070.51, 070.54, V02.61, V02.62, 571.0, 571.1, 571.2, 571.3, 571.4, 571.5, 571.6 |
| Gastritis or peptic ulcer disease | ICD-9-CM diagnosis codes: 531-535, 578.0, 578.1, 578.9 |
| Chronic kidney disease | ICD-9-CM diagnosis codes: 403.01, 403.11, 403.91, 404.02, 404.03, 404.12, 404.13, 404.92, 404.93, 585 ,V45.1, V56.0, V56.8 |
| Rheumatoid arthritis, osteoarthritis, or ankylosing spondylitis | ICD-9-CM diagnosis codes: 714, 715, 720 |
| Osteoporosis | ICD-9-CM diagnosis codes: 733.0 |
| Autoimmune diseases | ICD-9-CM diagnosis codes: 245.2, 283.0, 340, 358.0, 364.0, 364.3, 555, 556, 696.0, 696.1, 710.0, 710.1, 710.2, 710.4, 714.0 |
| Transplant | ICD-9-CM diagnosis codes: V42, 996.8 |
| Acquired immune deficiency syndrome | ICD-9-CM diagnosis codes: 042-044 |
| Gout | ICD-9-CM diagnosis codes: 274 |
| Any cancer other than lung cancer | ICD-9-CM diagnosis codes: 140-161, 163-208 |
| Lung cancer | ICD-9-CM diagnosis codes: 162 |
| Dementia | ICD-9-CM diagnosis codes: 290.0-290.4, 291.2, 294.1, 331.0-331.2, 331.82 |
| Seizure | ICD-9-CM diagnosis codes: 345, 780.3 |
| Depressive disorder | ICD-9-CM diagnosis codes: 296.2, 296.3, 298.0, 300.4, 309.0, 309.1, 293.83, 296.90, 309.28, 296.82, 311 |
| Anxiety disorder | ICD-9-CM diagnosis codes: 300.0-300.3,300.5-300.9 |
| Psychotic disorder | ICD-9-CM diagnosis codes:295, 297-299, 290.8, 290.9, 780.1 |
| Bipolar disorder | ICD-9-CM diagnosis codes: 296.0, 296.1, 296.4-296.9 |

COPD, chronic obstructive pulmonary disease.

a<https://www.nhi.gov.tw/query/query2.aspx> Accessed April 16, 2021.

**Appendix Table 4.** Anatomical Therapeutic Chemical (ATC) classification system codes used to assess baseline medication use

| Medications | ATC classification System Codes |
| --- | --- |
| ACEIs/ARBs | C09 |
| β blockers | C07 |
| Calcium channel blockers | C08 |
| Diuretics | C03, C07B, C07C, C07D, C08G |
| Other anti-hypertensive agents | C02 |
| Nitrates | C01DA |
| Anti-arrhythmic agents | C01B |
| Digoxin | C01AA |
| Aspirin | B01AC06, N02BA01 |
| Clopidogrel | B01AC04 |
| Warfarin | B01AA03 |
| Insulin | A10A |
| Oral anti-diabetic agents | A10B |
| Thyroid-therapy drugs | H03 |
| Inhaled short-acting bronchodilators | SABAs: R03AC02, R03AC03, R03AC04, R03AC06  SAMAs: R03BB01  SABAs and SAMAs in combinations: R03AL01, R03AL02 |
| Inhaled long-acting bronchodilators | LABAs: R03AC12, R03AC13, R03AC16, R03AC18, R03AC19  LAMAs: R03BB04, R03BB05, R03BB06, R03BB07  Inhaled corticosteroids and LABAs in combinations: R03AK06, R03AK07, R03AK08, R03AK09, R03AK10, R03AK11, R03AK12  LABAs and LAMAs in combinations: R03AL03, R03AL04, R03AL05, R03AL06, R03AL07, R03AL08 |
| Inhaled corticosteroids | Inhaled corticosteroids: R03BA  Inhaled corticosteroids and LABAs in combinations: R03AK06, R03AK07, R03AK08, R03AK09, R03AK10, R03AK11, R03AK12 |
| Oral bronchodilators | Oral β-2 agonists: R03CC02, R03CC03, R03CC04, R03CC05, R03CC08, R03CC09, R03CC12, R03CC13, R03CC91  Oral xanthenes: R03DA04, R03DA05 |
| Oral corticosteroids | H02AB, H02BX |
| Antibiotics | J01 |
| Histamine 2 antagonists / PPIs | A02BA, A02BC |
| COX-2 selective NSAIDs | M01AH |
| COX-2 nonselective NSAIDs | M01AA, M01AB, M01AC, M01AE, M01AG, M01AX |
| Anti-epileptics | N03 |
| Anti-depressants: | N06A |
| Anxiolytics | N05B |
| Hypnotics | N05C |
| Anti-psychotics | N05A |
| Uric acid lowering agents | M04A |

ACEIs, angiotensin converting enzyme inhibitors; ARBs, angiotensin Ⅱ receptor blockers; Cox, cyclooxygenase; LABAs, long-acting beta-2 agonists; LAMAs, long-acting muscarinic antagonist; NSAIDs, non-steroidal anti-inflammatory drugs; PPIs, proton pump inhibitors; SABAs, short-acting beta-2 agonists; SAMAs, short-acting muscarinic antagonists.

**Appendix Table 5.** Baseline characteristics of the eligible cohort

|  | Before matching (n=134,909) | | | After hd-PS matching (n=127,855) | | |
| --- | --- | --- | --- | --- | --- | --- |
|  | Statins  (n=110,726) | Fibrates  (n=24,183) | Standardized differencea | Statins  (n=103,735) | Fibrates  (n=24,120) | Standardized differencea |
| Variables |  |  |  | n=24,120b | n=24,120b |  |
| **Demographics** |  |  |  |  |  |  |
| Age, mean (SD) | 67.6 (11.8) | 63.9 (12.6) | 0.31 | 63.9 (12.0) | 63.9 (12.5) | <0.01 |
| Male, n (%) | 64,110 (57.9) | 15,291 (63.2) | 0.11 | 15,229 (63.1) | 15,239 (63.2) | <0.01 |
| COPD duration, mean (SD) | 595.4 (592.3) | 507.1 (513.8) | 0.16 | 499.0 (516.5) | 507.4 (514.1) | 0.02 |
| **Calendar year of the index date** | | | | | | |
| Index year=2009 | 24,294 (21.9) | 6,766 (28.0) | 0.14 | 6,812 (28.2) | 6,734 (27.9) | 0.01 |
| Index year=2010 | 20,504 (18.5) | 5,007 (20.7) | 0.06 | 4,927 (20.4) | 4,994 (20.7) | <0.01 |
| Index year=2011 | 17,317 (15.6) | 4,056 (16.8) | 0.03 | 3,993 (16.6) | 4,044 (16.8) | <0.01 |
| Index year=2012 | 16,561 (15.0) | 3,399 (14.1) | 0.03 | 3,363 (13.9) | 3,396 (14.1) | <0.01 |
| Index year=2013 | 16,473 (14.9) | 2,795 (11.6) | 0.01 | 2,809 (11.7) | 2,793 (11.6) | <0.01 |
| Index year=2014 | 15,577 (14.1) | 2,160 (8.9) | 0.16 | 2,216 (9.2) | 2,159 (9.0) | <0.01 |
| **Mean dose of the index prescriptions** | | | | | | |
| Index dose (ddd/day), mean (SD) | 0.7 (0.4) | 0.8 (0.4) | 0.16 | 0.8 (0.5) | 0.8 (0.4) | <0.01 |
| **Resource utilization, mean (SD)** | | | | | | |
| Number of outpatient visits | 42.9 (26.7) | 42.8 (28.1) | <0.01 | 43.1 (27.7) | 42.8 (28.1) | 0.01 |
| Number of outpatient visits due to cardiovascular diseasec | 8.7 (8.7) | 8.0 (8.6) | 0.08 | 8.1 (8.7) | 8.0 (8.6) | 0.01 |
| Number of outpatient visits due to respiratory diseases | 3.4 (6.2) | 3.2 (5.8) | 0.04 | 3.3 (6.0) | 3.2 (5.8) | 0.01 |
| Number of outpatient visits due to COPD | 4.6 (5.8) | 4.2 (5.5) | 0.08 | 4.2 (5.3) | 4.2 (5.5) | <0.01 |
| Number of hospitalizations | 0.6 (1.4) | 0.5 (1.4) | 0.05 | 0.5 (1.7) | 0.5 (1.3) | <0.01 |
| Number of hospitalizations due to cardiovascular diseasec | 0.4 (0.8) | 0.3 (0.8) | 0.14 | 0.3 (0.7) | 0.3 (0.7) | 0.01 |
| Number of hospitalizations due to respiratory diseases | 0.1 (0.5) | 0.1 (0.5) | 0.04 | 0.1 (0.4) | 0.1 (0.5) | <0.01 |
| Number of hospitalizations due to COPD | 0.3 (0.6) | 0.1 (0.5) | 0.11 | 0.1 (0.5) | 0.1 (0.5) | <0.01 |
| Number of cholesterol test ordered | 1.8 (1.5) | 1.6 (1.6) | 0.08 | 1.6 (1.4) | 1.6 (1.6) | <0.01 |
| Number of triglyceride test ordered | 1.7 (1.5) | 1.7 (1.6) | <0.01 | 1.7 (1.5) | 1.7 (1.6) | <0.01 |
| Pneumonia and influenza vaccination, n (%) | 30,383 (27.4) | 5,917 (24.5) | 0.07 | 5,877 (24.4) | 5,911 (24.5) | <0.01 |
| **Comorbidities, n (%)** |  | | | | | |
| Hypertension | 75,699 (68.4) | 15,906 (65.8) | 0.06 | 16,020 (66.4) | 15871 (65.8) | <0.01 |
| Ischemic heart disease | 37,259 (33.7) | 6,107 (25.3) | 0.19 | 6,042 (25.1) | 6,100 (25.3) | <0.01 |
| Myocardial infarction | 5,221 (4.7) | 296 (1.2) | 0.21 | 307 (1.3) | 296 (1.2) | <0.01 |
| Coronary revascularization | 5,507 (5.0) | 238 (1.0) | 0.24 | 255 (1.1) | 238 (1.0) | <0.01 |
| Cardiac dysrhythmia | 16,050 (14.5) | 2,724 (11.3) | 0.10 | 2,709 (11.2) | 2,720 (11.3) | <0.01 |
| Congestive heart failure | 17,007 (15.4) | 2,785 (11.5) | 0.11 | 2,803 (11.6) | 2,781 (11.5) | <0.01 |
| Cereborvascular disease | 20,945 (18.9) | 3,693 (15.3) | 0.10 | 3,746 (15.5) | 3,683 (15.3) | 0.01 |
| Peripheral vascular disease | 3,152 (2.9) | 747 (3.1) | 0.01 | 738 (3.1) | 745 (3.1) | <0.01 |
| Hyperlipidemia | 72,648 (65.6) | 17,143 (70.9) | 0.11 | 17,085 (70.8) | 17,088 (70.9) | <0.01 |
| Diabetes mellitus | 39,944 (36.1) | 9,310 (38.5) | 0.05 | 9,387 (38.9) | 9,281 (38.5) | 0.01 |
| Thyroid disease | 1,092 (1.0) | 186 (0.8) | 0.02 | 171 (0.7) | 186 (0.8) | <0.01 |
| Asthma | 26,451 (23.9) | 5,006 (20.7) | 0.08 | 5,044 (20.9) | 4,999 (20.7) | 0.01 |
| Pneumonia, influenza, or acute bronchitis | 58,514 (52.9) | 12,998 (53.8) | 0.02 | 13,036 (54.1) | 12,953 (53.7) | 0.01 |
| Acute bronchiectasis | 3,621 (3.3) | 570 (2.4) | 0.06 | 408 (1.7) | 409 (1.7) | <0.01 |
| Tuberculosis | 2,002 (1.8) | 410 (1.7) | 0.01 | 573 (2.4) | 570 (2.4) | <0.01 |
| Chronic liver disease | 14,479 (13.1) | 4,367 (18.1) | 0.14 | 4,333 (18.0) | 4,335 (18.0) | <0.01 |
| Gastritis or peptic ulcer disease | 46,008 (41.6) | 10,468 (43.3) | 0.04 | 10,378 (43.0) | 10,433 (43.3) | <0.01 |
| Chronic kidney disease | 7,135 (6.4) | 1,449 (6.0) | 0.02 | 1532 (6.4) | 1,446 (6.0) | 0.02 |
| Rheumatoid arthritis, osteoarthritis, and ankylosing spondylitis | 33,331 (30.1) | 6,941 (28.7) | 0.03 | 6,952 (28.8) | 6,925 (28.7) | <0.01 |
| Osteoporosis | 6,740 (6.1) | 1,236 (5.1) | 0.04 | 1,255 (5.2) | 1,232 (5.1) | <0.01 |
| Autoimmune diseases | 5,797 (5.2) | 1,150 (4.8) | 0.02 | 1,101 (4.6) | 1,143 (4.7) | 0.01 |
| T ransplant | 181 (0.2) | 41 (0.2) | <0.01 | 40 (0.3) | 41 (0.2) | <0.01 |
| Acquired immune deficiency syndrome | 28 ( <0.1) | 24 (0.1) | 0.03 | 21 (0.1) | 23 (0.1) | <0.01 |
| Gout | 15,655 (14.1) | 4,766 (19.7) | 0.15 | 4,743 (19.7) | 4,741 (19.7) | <0.01 |
| Any cancer other than lung cancer | 6,632 (6.0) | 1,314 (5.4) | 0.02 | 1,348 (5.6) | 1,311 (5.4) | 0.01 |
| Lung cancer | 1,530 (1.4) | 251 (1.0) | 0.03 | 262 (1.1) | 251 (1.0) | <0.01 |
| Dementia | 4,689 (4.2) | 898 (3.7) | 0.03 | 850 (3.5) | 896 (3.7) | <0.01 |
| Seizure | 1,882 (1.7) | 492 (2.0) | 0.03 | 472 (2.0) | 489 (2.0) | <0.01 |
| Depressive disorder | 7,337 (6.6) | 1,792 (7.4) | 0.03 | 1,761 (7.3) | 1,782 (7.4) | <0.01 |
| Anxiety disorder | 18,695 (16.9) | 4,187 (17.3) | 0.01 | 4,172 (17.3) | 4,172 (17.3) | <0.01 |
| Psychotic disorder | 1,439 (1.3) | 533 (2.2) | 0.07 | 518 (2.2) | 529 (2.2) | <0.01 |
| Bipolar disorder | 1,268 (1.2) | 365 (1.5) | 0.03 | 344 (1.4) | 360 (1.5) | 0.01 |
| **Medications, n (%)** |  | | | | | |
| ACEI s/ARBs | 57,274 (51.7) | 10,927 (45.2) | 0.13 | 10,943 (45.4) | 10,908 (45.2) | <0.01 |
| β blockers | 42,512 (38.4) | 9,154 (37.9) | 0.01 | 9,296 (38.5) | 9,126 (37.8) | 0.02 |
| Calcium channel blockers | 62,226 (56.2) | 12,677 (52.4) | 0.08 | 12,714 (52.7) | 12,656 (52.5) | 0.01 |
| Diuretics | 37,312 (33.7) | 7,288 (30.1) | 0.08 | 7,368 (30.6) | 7,268 (30.1) | 0.01 |
| Other anti-hypertensive agents | 13,771 (12.4) | 3,065 (12.7) | 0.01 | 3,117 (12.9) | 3,057 (12.7) | 0.01 |
| Nitrates | 27,457 (24.8) | 4,032 (16.7) | 0.20 | 4,119 (17.1) | 4,027 (16.7) | <0.01 |
| Anti-arrhythmic agents | 7,658 (6.9) | 1,097 (4.5) | 0.10 | 1,117 (4.6) | 1,093 (4.5) | 0.01 |
| Digoxin | 5,751 (5.2) | 1,278 (5.3) | <0.01 | 1,303 (5.4) | 1,271 (5.3) | 0.01 |
| Aspirin | 48,791 (44.1) | 8,436 (34.9) | 0.19 | 8,446 (35.0) | 8,420 (34.9) | <0.01 |
| Clopidogrel | 12,143 (11.0) | 1,022 (4.2) | 0.26 | 1,027 (4.3) | 1,021 (4.2) | <0.01 |
| Warfarin | 2,944 (2.7) | 374 (1.6) | 0.08 | 362 (1.5) | 374 (1.6) | <0.01 |
| Insulin | 10,369 (9.4) | 2,189 (9.1) | 0.01 | 2,184 (9.1) | 2,179 (9.0) | <0.01 |
| Oral anti-diabetic agents | 32,995 (29.8) | 7,716 (31.9) | 0.05 | 7,772 (32.2) | 7,687 (31.9) | 0.01 |
| Thyroid-therapy drugs | 2,746 (2.5) | 484 (2.0) | 0.03 | 461 (1.9) | 482 (2.0) | 0.01 |
| Inhaled short-acting bronchodilators | 83,741 (75.6) | 19,506 (80.7) | 0.12 | 19,412 (80.5) | 19,454 (80.7) | <0.01 |
| Inhaled long-acting bronchodilators | 19,140 (17.3) | 2,710 (11.2) | 0.18 | 2,780 (11.5) | 2,710 (11.2) | 0.01 |
| Inhaled corticosteroids; | 18,253 (16.5) | 2,648 (11.0) | 0.16 | 2,695 (11.2) | 2,647 (11.0) | 0.01 |
| Oral bronchodilators | 79,607 (71.9) | 17,117 (70.8) | 0.03 | 17,061 (70.7) | 17,067 (70.8) | <0.01 |
| Oral corticosteroids | 56,001 (50.6) | 11,654 (48.2) | 0.05 | 11,606 (48.1) | 11,617 (48.2) | <0.01 |
| Antibiotics | 81,371 (73.5) | 17,746 (73.4) | <0.01 | 17,795 (73.8) | 17,692 (73.4) | 0.01 |
| Histamine 2 antagonists / PPIs | 52,771 (47.7) | 11,231 (46.4) | 0.02 | 11,190 (46.4) | 11,200 (46.4) | <0.01 |
| COX-2 selective NSAIDs | 14,545 (13.1) | 2,543 (10.5) | 0.08 | 2,650 (11.0) | 2,537 (10.5) | 0.02 |
| COX-2 nonselective NSAID | 88,609 (80.0) | 19,980 (82.6) | 0.07 | 19,998 (82.9) | 19,919 (82.6) | 0.01 |
| Anti-epileptics | 14,439 (13.0) | 3,255 (13.5) | 0.01 | 3,132 (13.0) | 3,243 (13.5) | 0.01 |
| Anti-depressants: | 16,447 (14.9) | 3,617 (15.0) | <0.01 | 3,594 (14.9) | 3,599 (14.9) | <0.01 |
| Anxiolytics | 61,616 (55.7) | 13,183 (54.5) | 0.02 | 13,126 (54.4) | 13,143 (54.5) | <0.01 |
| Hypnotics | 28,574 (25.8) | 6,493 (26.9) | 0.02 | 6,398 (26.5) | 6,466 (26.8) | 0.01 |
| Anti-psychotics | 18,903 (17.1) | 4,293 (17.8) | 0.02 | 4,282 (17.8) | 4,276 (17.7) | <0.01 |
| Uric acid lowering agents | 19,250 (17.4) | 5,579 (23.1) | 0.14 | 5,595 (23.2) | 5,548 (23.0) | 0.01 |

ACEIs, angiotensin converting enzyme inhibitors; ARBs, angiotensin Ⅱ receptor blockers; COPD, chronic obstructive pulmonary disease; Cox, cyclooxygenase; hd-PS, high-dimensional propensity score; NSAIDs, non-steroidal anti-inflammatory drugs; PPIs, proton pump inhibitors.

aData were presented as absolute values.

bOne initiator of statins : one randomly sampled initiator of fibrates in each matched subset.

cCardiovascular disease included hypertension, ischemic heart disease, myocardial infarction, coronary revascularization, cardiac dysrhythmia congestive heart failure, cereborvascular disease, and peripheral vascular disease.

**Appendix Table 6.** Summary of available real-world evidence

| Author, year | Data source / Study design / Study population | Relative risk of COPD exacerbationsa |
| --- | --- | --- |
| Mancini et al. 200626 | - Canadian Quebec Linked Database - Nested case-control study - COPD patients with high CV risk profile (case: n=946; matched controls: n=18,774)   COPD patients with low CV risk profile (case: n=1,028; matched controls: n=20,429)   - Use of statins was based on records within 60 days before outcome occurrence. | Among COPD patients with a high CV risk profile   - aOR: 0.71 (95% CI, 0.56-0.90)   Among COPD patients with a low CV risk profile   - aOR: 0.71 (95% CI, 0.64-0.77) |
| Blamoun et al. 200827 | - One US tertiary-care, teaching hospital - Cohort study - COPD patients (statin users: n=90; non-statin users: n=95) - Patients were followed for up to 1 yearb | - cHR: 0.19 (95% CI, 0.06-0.14) |
| Bartziokas et al. 201128 | - Two Greek tertiary hospitals - Cohort study - COPD patients who were hospitalized for acute exacerbations (statin users: n=171; non-statin users: n=74) - Patients were followed for up to 1 yearb | - aHR: 0.61 (95% CI, 0.38-0.97) |
| Huang et al. 201129 | - Taiwan LHID - Cohort study - COPD patients (statin users: n=6,252; non-statin users: n=12,469) - Patients were followed for up to 8 yearsb | - aHR: 0.66 (95% CI, 0.60-0.74) |
| Ozyilmaz et al. 201330 | - A Turkish university-affiliated hospital - Cohort study - COPD patients (stain users: n=29; non-statin users: n=78) - Patients were followed for up to 2 monthsb | - aOR: 0.33 (95% CI, 0.06-1.88) |
| Wang et al. 201331 | - Taiwan LHID - Nested case-control study - COPD patients (cases: n=1,584; matched controls: n=5,950) - Use of statins was based on records from COPD cohort entry to outcome occurrence. | - aOR: 0.70 (95% CI, 0.56-0.88) |
| Ingebrigtsen et al. 201532 | - Copenhagen General Population Study data - Nested case-control study - COPD patients (cases: n=530; matched controls: 1,016) - Use of statins was based on records within 90 days before outcome occurrence. | - aOR: 0.71 (95% CI, 0.51-0.99) |
| Citgez et al. 201633 | - One Dutch single center - Cohort study - COPD patients (statin users: n=253; non-statin users: n=542) - Patients were followed for at least 3 yearsb | - cHR: 0.95 (95% CI, 0.74-1.22) |
| Ajmera et al. 201734 | - US Medicaid claims data - Cohort study - COPD patients (statin users: n=5,771; non-statin users: n=13,289) - Patients were followed for up to 1 yearb | - aOR: 0.79 (95% CI, 0.68-0.92) |
| Lin et al. 202035 | - Taiwan NHIRD - Cohort study - COPD patients who were hospitalized for acute exacerbations (statin users: n=11,101; non-statin users: n=128,122) - Patients were followed for up to 1 yearb | - aHR: 0.89 (95% CI, 0.85-0.93) |
| Huang et al. 202136 | - Taiwan LHID - Cohort study - COPD patients (statin users: n=11,578; matched non-statin users: n=46,312) - Patients were followed for up to 16 yearsb | - aHR: 0.84 (95% CI, 0.75-0.90) |
| Damkjer et al. 202137 | - Copenhagen University Hospital Amager and Hvidovre - Cohort study - COPD patients (statin users: n=262; non-statin users: n=557) - Patients were followed for up to 3.5 yearsb | - aHR: 1.07 (95% CI, 0.89-1.29) |

aHR, adjusted hazard ratio; aOR, adjusted odds ratio; CI, confidence interval; COPD, chronic obstructive pulmonary disease; cOR, crude odds ratio; CV, cardiovascular disease; LHID, Longitudinal Health Insurance Database; NHIRD, National Health Insurance Research Database.

aThe definition of COPD exacerbations was as an acute exacerbation leading to hospitalization except Blamoun et al’s study.

bPatients were followed-up regardless of statin discontinuation.
